# Supplementary material
Source: PubMed Central journal article supplement (PMC2952690)
Supplement: NIHMS219603-supplement-Supp_Table_s1-s2.pdf [file NIHMS219603-supplement-Supp_Table_s1-s2.pdf]

**Table S1: CAPRI Targets analyzed in this study.** The decamer peptide at the interface that contributes most to the binding energy is indicated, together with the absolute and relative binding energy contribution (estimated using the Rosetta Energy function, See Methods).

Targets are sorted based on energy funnel towards native and decreasing fraction of interaction energy of peptide.

| Target   | Complex                                                         | Chain I | Chain II | Inhibitory peptide sequence | Peptide interaction energy | Fraction of Total Interaction Energy Contributed by Peptide | Partner from which Peptide is Derived | Funnel in energy landscape towards native |     |
|----------|-----------------------------------------------------------------|---------|----------|-----------------------------|----------------------------|-------------------------------------------------------------|---------------------------------------|-------------------------------------------|-----|
| T32      | Protease savinase (1SVN) / bifunctional inhibitor BASI (1AVA_C) | 3bx1    | A        | C                           | RAYTTCQLQST                | -18.37                                                      | 81.6%                                 | II                                        | yes |
| T40a     | bovine trypsin / protease inhibitor (API-A)                     | 3e8l    | A        | C                           | SCEFCKIACP                 | -20.36                                                      | 74.8%                                 | II                                        | yes |
| T17      | XIP-1 xylanase inhibitor / xylanase                             | 1te1    | A        | B                           | NIRGGPGKPL                 | -21.64                                                      | 72.5%                                 | I                                         | yes |
| T22      | U5-15K / U5-52                                                  | 1sxy    | A        | B                           | YNSKRIDFDL                 | -10.00                                                      | 63.5%                                 | II                                        | yes |
| T21      | Orc1 / Sir1                                                     | 1zhi    | A        | B                           | EEVSPRFLV                  | -12.80                                                      | 62.1%                                 | II                                        | yes |
| T29      | Trm8 / Trm82 tRNA guanine-N(7)-methyltransferase                | 2vdu    | B        | E                           | FIVDKWLFHG                 | -13.04                                                      | 61.5%                                 | I                                         | yes |
| T11      | Cohesin / dockerin (Cellulosome)                                | 1ohz    | A        | B                           | NSTDVLLLSR                 | -11.84                                                      | 54.1%                                 | II                                        | yes |
| T08      | Nidogen-G3 / laminin                                            | 1npe    | A        | B                           | DNIDPNAVGN                 | -12.23                                                      | 53.8%                                 | II                                        | yes |
| T26      | ToIB / Pal                                                      | 2hqs    | A        | H                           | DERGTPEYNI                 | -13.80                                                      | 51.0%                                 | II                                        | yes |
| T20      | HemK / eRF1                                                     | 2b3t    | A        | B                           | AGGQHVNTTD                 | -21.81                                                      | 47.2%                                 | II                                        | yes |
| T39      | Centaurin-alpha / FHA domain                                    | 3fm8    | A        | C                           | QPAKIGHPHG                 | -10.68                                                      | 45.0%                                 | II                                        | yes |
| T06      | antibody VH domain 3                                            | 1kxq    | A        | H                           | AIYRRTYGTY                 | -12.55                                                      | 43.9%                                 | II                                        | yes |
| T13      | SAG1 / antibody                                                 | 1ynt    | A,B      | F                           | SCTSKAVTSL                 | -8.27                                                       | 43.1%                                 | II                                        | yes |
| T23      | GBP1 dimer                                                      | 2b8w    | A        | B                           | DFSLDLEADG                 | -13.77                                                      | 23.0%                                 | II                                        | yes |
| T01 (i)  | HPr / Phospho-carrier                                           | 1kkl    | A,C      | H                           | IMGVMSLGIA                 | -12.68                                                      | 70.4%                                 | II                                        | no  |
| T07      | T cell receptor beta chain / pyrogenic exotoxin A (SpeA)        | 110x    | A        | B                           | SYGAGSTEKG                 | -10.18                                                      | 57.5%                                 | I                                         | no  |
| T16      | XIP-1 / xylanase                                                | 1ta3    | A        | B                           | QWVHPKNVYY                 | -15.56                                                      | 56.9%                                 | I                                         | no  |
| T27      | E2-25K / Ubc9                                                   | 2o25    | B        | C                           | ENLCAMGFDR                 | -6.03                                                       | 56.5%                                 | I                                         | no  |
| T05 (i)  | alpha-amylase / camelide antibody VH domain 2                   | 1kxv    | A        | C                           | LYRGLPGCPI                 | -11.63                                                      | 56.4%                                 | II                                        | no  |
| T03      | flu hemagglutinin / Fab HC63                                    | 1ken    | AC       | L,H                         | FYYDYDFFD                  | -7.59                                                       | 56.4%                                 | II                                        | no  |
| T05 (ii) | alpha-amylase / camelide antibody VH domain 2                   | 1kxv    | A        | C                           | WPGDIKAVLD                 | -10.66                                                      | 51.8%                                 | I                                         | no  |
| T24      | Arf1 / ARHGap10                                                 | 2j59    | A        | M                           | VTTIPTIGFN                 | -11.46                                                      | 50.6%                                 | I                                         | no  |
| T01 (ii) | HPr / Phospho-carrier                                           | 1kkl    | A,C      | H                           | LNHLIEHNEE                 | -9.04                                                       | 50.2%                                 | I                                         | no  |
| T04      | alpha-amylase / camelide antibody VH domain 1                   | 1kxt    | A        | B                           | KWSGEKMSYL                 | -10.43                                                      | 49.5%                                 | I                                         | no  |
| T18      | TAXI / Xylanase                                                 | 1t6g    | A        | C                           | FSRLPHFTGC                 | -11.46                                                      | 45.5%                                 | I                                         | no  |
| T37      | Arf / Effector                                                  | 2w83    | B        | C,D                         | DLIAKVDELDT                | -7.44                                                       | 44.6%                                 | II                                        | no  |
| T14      | phosphatase-1 / myosin phosphatase targeting subunit 1          | 1s70    | A        | B                           | SEKAKYQYG                  | -22.35                                                      | 35.2%                                 | I                                         | no  |
| T15      | ImmD / ColD                                                     | 1v74    | A        | B                           | LDKKYKHAGD                 | -9.95                                                       | 34.9%                                 | I                                         | no  |
| T40b     | bovine trypsin / protease inhibitor (API-A)                     | 3e8l    | B        | C                           | SMPVPLICDT                 | -17.14                                                      | 60.3%                                 | B                                         | no  |

**Table S2: Decamer peptides for Docking Benchmark 3.0 (Hwang et al., Proteins, 2008).** See Table S1 for more details.

Targets are sorted based on energy funnel towards native and decreasing fraction of interaction energy of peptide.

| PDB  | Complex                              |                                            | Inhibitory Peptide Sequence | Peptide interaction energy (best decamer) | Fraction of total interaction energy contributed by peptide | partner from which peptide is derived# |
|------|--------------------------------------|--------------------------------------------|-----------------------------|-------------------------------------------|-------------------------------------------------------------|----------------------------------------|
| 1D6R | Bovine trypsin                       | Bowman-Birk inhibitor                      | QCACTKSNNP                  | -12.85                                    | 100.0%                                                      | II                                     |
| 1OPH | a-1-Antitrypsin                      | Trypsinogen                                | LEAIPRSIPP                  | -25.29                                    | 99.5%                                                       | I                                      |
| 2HMI | Fab 28                               | HIV1 reverse transcriptase                 | QKEPFLWMG                   | -6.16                                     | 97.0%                                                       | I                                      |
| 1AK4 | Cyclophilin                          | HIV capsid                                 | PVHAGPIAPG                  | -23.54                                    | 95.9%                                                       | II                                     |
| 1GHQ | Complect C3                          | Epstein-Barr virus receptor CR2            | YKIRGSTPYR                  | -11.77                                    | 93.6%                                                       | II                                     |
| 1HIA | Kallikrein                           | Hirustatin                                 | NEVHCRIRCK                  | -28.52                                    | 92.3%                                                       | II                                     |
| 1ACB | Chymotrypsin                         | Eglin C                                    | PVTLDLRYNR                  | -31.45                                    | 92.1%                                                       | II                                     |
| 2UUY | Trypsin                              | Tryptase inhibitor from tick               | GLCKARFTRY                  | -25.73                                    | 91.4%                                                       | II                                     |
| 2SNI | Subtilisin                           | Chymotrypsin inhibitor 2                   | GTIVTMEYRI                  | -29.75                                    | 89.3%                                                       | II                                     |
| 1R0R | Subtilisin Carlsberg                 | OMTKY                                      | PKPACTLEYR                  | -30.44                                    | 88.0%                                                       | II                                     |
| 1PPE | Bovine trypsin                       | CMTI-1 squash inhibitor                    | RVCPRIIMEC                  | -28.12                                    | 87.0%                                                       | II                                     |
| 2SIC | Subtilisin                           | Streptomyces subtilisin inhibitor          | GEDVMCPMVY                  | -26.69                                    | 86.6%                                                       | II                                     |
| 1CGI | Bovine chymotrypsinogen              | PSTI                                       | ELNGCTYEYR                  | -36.02                                    | 84.4%                                                       | II                                     |
| 1E6J | Fab                                  | HIV-1 capsid protein p24                   | ALGPAATLEE                  | -16.81                                    | 84.2%                                                       | II                                     |
| 1AVX | Porcine trypsin                      | Soybean trypsin inhibitor                  | IISSPYRIRF                  | -23.52                                    | 83.9%                                                       | II                                     |
| 1BJ1 | Fab                                  | vEGF                                       | PHQGQHIGEM                  | -26.60                                    | 82.9%                                                       | II                                     |
| 1N80 | Chymotrypsin                         | Ecotin                                     | SPVSTMMACP                  | -28.46                                    | 81.7%                                                       | II                                     |
| 2I25 | Shark single domain antigen receptor | Lysozyme                                   | ESRYGSYDAV                  | -21.68                                    | 81.3%                                                       | I                                      |
| 1GLA | Glycerol kinase                      | Glucose specific phosphocarrier            | GIETTERNYR                  | -12.64                                    | 78.1%                                                       | I                                      |
| 1FSK | Fab                                  | Birch pollen antigen Bet V1                | NIEGGGPGT                   | -19.81                                    | 76.4%                                                       | II                                     |
| 1HE8 | Ras GTPase                           | PIP3 kinase                                | DPTIEDSYRK                  | -12.65                                    | 75.4%                                                       | II                                     |
| 2FD6 | Plasminogen receptor antibody        | Plasminogen activator receptor             | ENLPQNGRQC                  | -14.74                                    | 74.5%                                                       | II                                     |
| 1QFW | Fv                                   | Human chorionic gonadotropin               | CPRGVNPVVS                  | -13.38                                    | 72.2%                                                       | II                                     |
| 1FC2 | Staphylococcus Protein A             | Human Fc fragment                          | QQNAFYEILH                  | -8.61                                     | 71.9%                                                       | I                                      |
| 1KKL | HPr kinase C-ter domain              | HPr                                        | IMGVMSLGIA                  | -12.62                                    | 70.9%                                                       | II                                     |
| 1FQ1 | CDK2 kinase                          | CDK inhibitor 3                            | IQTIKQYNYL                  | -11.89                                    | 70.7%                                                       | I                                      |
| 1I9R | Fab                                  | Cd40 liqand                                | CQHSWEIPPT                  | -7.37                                     | 70.6%                                                       | II                                     |
| 2C0L | PTS1 and TRP region of PEX5          | SCP2                                       | LQLQPGNAKL                  | -22.07                                    | 69.8%                                                       | II                                     |
| 1BVK | Fv Hulys11                           | HEW lysozyme                               | KGTDVQAWIR                  | -12.05                                    | 69.6%                                                       | II                                     |
| 1AY7 | Barnase                              | Barstar                                    | YGENLDALWD                  | -14.94                                    | 69.5%                                                       | II                                     |
| 1EAW | Matriptase                           | BPTI                                       | TGPCKARIIR                  | -19.30                                    | 68.9%                                                       | II                                     |
| 1PXV | Cystein protease                     | Cystein protease inhibitor                 | QGITGSRPIV                  | -29.14                                    | 68.5%                                                       | II                                     |
| 1E96 | Rac GTPase                           | p67 Phox                                   | TTNAFPGEYI                  | -11.07                                    | 67.9%                                                       | I                                      |
| 2O0B | Ubiquitin ligase                     | Ubiquitin                                  | VDAKIAKLMG                  | -10.67                                    | 67.0%                                                       | I                                      |
| 2HLE | Ephrin B4 receptor                   | Ephrin B2 ectodomain                       | KFQFSPNLW                   | -19.52                                    | 65.6%                                                       | II                                     |
| 1A2K | Ran GTPase                           | Nuclear transport factor 2                 | AGQEKFGGLR                  | -15.62                                    | 65.5%                                                       | II                                     |
| 1ATN | Actin                                | Dnase I                                    | PRHQGMVGM                   | -20.17                                    | 65.4%                                                       | I                                      |
| 1KTZ | TGF-b                                | TGF-b receptor                             | TILYYVGRTP                  | -12.28                                    | 65.1%                                                       | I                                      |
| 1K4C | Fab                                  | Potassium Channel Kcsa                     | RGAPGAQLIT                  | -22.64                                    | 64.5%                                                       | II                                     |
| 1Z5Y | N-term of DsbD                       | E.coli CCMG protein                        | SADAGFCYPP                  | -14.94                                    | 62.6%                                                       | II                                     |
| 1ZHI | BAH domain of Orc1                   | Sir Orc-interaction domain                 | EEYVSPRFLV                  | -12.80                                    | 62.1%                                                       | II                                     |
| 1MAH | Acetylcholinesterase                 | Fasciculin                                 | SRRHPPKMVL                  | -12.00                                    | 62.0%                                                       | II                                     |
| 1B6C | FKBP binding protein                 | TGFb receptor                              | PLLVQRTIAR                  | -15.38                                    | 61.9%                                                       | II                                     |
| 2H7V | Rac GTPase                           | Ypka                                       | FDYDLRPLSY                  | -12.48                                    | 61.5%                                                       | II                                     |
| 1NSN | Fab N10                              | Staphylococcal nuclease                    | FTKKMVENAK                  | -6.67                                     | 61.4%                                                       | II                                     |
| 1VFB | Fv D1.3                              | HEW lysozyme                               | KGTDVQAWIR                  | -13.71                                    | 60.5%                                                       | II                                     |
| 1S1Q | UEV domain                           | Ubiquitin                                  | DSYVFNDSGS                  | -10.12                                    | 59.8%                                                       | I                                      |
| 1XD3 | UCH-L3                               | Ubiquitin                                  | TLHLVLRLRG                  | -26.56                                    | 59.4%                                                       | II                                     |
| 1SBB | T-cell receptor b                    | Staphylococcus enterotoxin B               | YSYGAGSTEK                  | -10.08                                    | 57.8%                                                       | I                                      |
| 1BVN | a-Amylase                            | Tendamistat                                | VTLYQSWRYS                  | -17.34                                    | 57.6%                                                       | II                                     |
| 1KLU | MHC class 2 HLA-DR1                  | Staphylococcus enterotoxin C3              | VDSFFKWDLI                  | -10.28                                    | 57.2%                                                       | II                                     |
| 1EFN | HIV-1-NEF protein                    | SH3 domain                                 | RPQVPLRPMT                  | -10.15                                    | 56.9%                                                       | I                                      |
| 2AJF | ACE2                                 | SARS spike protein receptor binding domain | FYTTTGIGYQ                  | -9.12                                     | 56.7%                                                       | II                                     |
| 1QA9 | CD2                                  | CD58                                       | WKKQKDKVAE                  | -9.65                                     | 56.3%                                                       | II                                     |
| 1I4D | Rac GTPase                           | Arfaptin                                   | TAHLYSLLQT                  | -8.95                                     | 56.3%                                                       | I                                      |
| 2MTA | Methylamine dehydrogenase            | Amicyanin                                  | YHCTPHPFMR                  | -9.63                                     | 55.6%                                                       | II                                     |
| 1EZU | D102N Trypsin                        | Ecotin                                     | PVSTMMACPD                  | -27.31                                    | 55.2%                                                       | II                                     |
| 1F34 | Porcine pepsin                       | Ascaris inhibitor 3                        | QFLFSMSTGP                  | -23.13                                    | 55.2%                                                       | II                                     |
| 2PCC | Cyt C peroxidase                     | Cytochrome C                               | GAANNVFTNE                  | -4.23                                     | 54.3%                                                       | I                                      |
| 1H1V | Actin                                | Gelsolin                                   | QDEVAASAIL                  | -10.74                                    | 54.1%                                                       | II                                     |
| 2CFH | BET3                                 | TPC6                                       | DEALFLLLHN                  | -19.11                                    | 53.8%                                                       | II                                     |
| 1ML0 | Viral chemokine binding p. M3        | Chemokine Mcp1                             | TCCYNFTNRK                  | -20.47                                    | 53.3%                                                       | II                                     |
| 1AKJ | MHC Class 1 HLA-A2                   | T-cell CD8 coreceptor                      | EDQTDQTELV                  | -11.99                                    | 52.9%                                                       | I                                      |

|      |                               |                                           |             |        |       |    |
|------|-------------------------------|-------------------------------------------|-------------|--------|-------|----|
| 2HRK | Glutamyl-t-RNA synthetase     | GU-4 nucleic binding protein              | NLRTFILGGL  | -11.20 | 52.4% | I  |
| 11JK | Von Willebrand Factor dom. A1 | Botroctetin                               | QRMSRNFVRY  | -10.00 | 52.2% | II |
| 1GPW | HISF protein                  | Amidotransferase HISH                     | RRLPHMGWNE  | -11.08 | 51.0% | II |
| 2HQS | TolB                          | Pal                                       | DERGTPEYNI  | -13.80 | 51.0% | II |
| 1RLB | Transthyretin                 | Retinol binding protein                   | RVRLLNWDV   | -6.48  | 49.8% | II |
| 1MLC | Fab44.1                       | HEW lysozyme                              | TNRNTDGSTD  | -9.13  | 49.7% | II |
| 1HE1 | Rac GTPase                    | Pseudomonas toxin GAP dom.                | GEYIPTVFDN  | -14.77 | 49.2% | II |
| 1GRN | CDC42 GTPase                  | CDC42 GAP                                 | QEDYDRLRPL  | -13.89 | 49.1% | I  |
| 2JEL | Fab Jel42                     | HPr                                       | EGEDEQKAVE  | -9.84  | 48.9% | II |
| 2VIS | Fab                           | Flu virus hemagglutinin                   | TGVIQNGGSN  | -6.54  | 48.8% | II |
| 1JMO | Heparin cofactor              | Thrombin                                  | GFMPPLSTQVR | -27.82 | 48.3% | I  |
| 7CEI | Colicin E7 nuclease           | Im7 immunity protein                      | KVGKAPKTRT  | -10.28 | 48.2% | II |
| 2NZ8 | Rac GTPase                    | DH/PH domain of TRIO                      | EDYDRLRPLS  | -14.98 | 47.7% | II |
| 112J | Arf1 GTPase                   | GAT domain of GGA1                        | LRAANKLIKE  | -8.27  | 47.5% | II |
| 1WEJ | Fab E8                        | Cytochrome C                              | IAYLKKATNE  | -10.64 | 46.9% | II |
| 1YVB | Falcipain 2                   | Cystatin                                  | RLLGAPVPVD  | -9.55  | 46.9% | II |
| 1M10 | Von Willebrand Factor dom. A1 | Glycoprotein IB-a                         | DVKAVTSNVA  | -13.61 | 46.4% | II |
| 1AZS | Adenylyl cyclase              | AC activator Gs a complex                 | SIWNNRWLRT  | -13.64 | 45.3% | II |
| 1NW9 | Capase-9                      | Ecotin                                    | GATPFQSSLP  | -16.31 | 44.7% | I  |
| 1UDI | Uracyl-DNA glycosylase        | Glycosylase inhibitor                     | QESLMLPEE   | -13.90 | 44.3% | II |
| 1KXQ | Camel VHH                     | Pancreatic a-amylase                      | AIYRRGTGYT  | -12.55 | 43.9% | II |
| 1E4K | FC fragment of human IgG 1    | Human FCGR III                            | KDRKYFHHNS  | -5.97  | 43.8% | II |
| 1Z0K | Rab4A GTPase                  | RAB4 binding domain of Rabenosyn          | HTIGVEFGSK  | -13.19 | 43.7% | I  |
| 1K74 | RXR-a                         | PPAR-g                                    | FAKLLRLPA   | -11.21 | 43.6% | I  |
| 1BUH | CDK2 kinase                   | Ckshs1                                    | GDSEIDQLFR  | -8.96  | 43.4% | I  |
| 1T6B | Anthrax protective antigen    | Anthrax toxin receptor                    | KKYNDKPLLY  | -8.49  | 43.2% | I  |
| 1IRA | Interleukin-1 receptor        | Interleukin-1 receptor antagonist protein | GYLQGPVNL   | -17.06 | 42.4% | II |
| 1GCQ | GRB2 C-ter SH3 domain         | GRB2 N-ter SH3 domain                     | MFPRNYTPV   | -9.14  | 42.2% | I  |
| 1DFJ | Ribonuclease A                | Rnase inhibitor                           | YDTYWTEEEV  | -8.84  | 41.6% | II |
| 11B1 | 14-3-3 protein                | Serotonin N-acteylase                     | QRRHLPANEF  | -14.05 | 41.3% | II |
| 11PS | Fab D3H44                     | Tissue factor                             | SGKKTAKTNT  | -13.41 | 41.2% | II |
| 1R8S | Arf1 GTPase                   | Sec 7 domain                              | TIPTIGFNVE  | -17.69 | 40.9% | I  |
| 1DQJ | Fab Hyhel63                   | HEW lysozyme                              | NCAKKIVSDG  | -8.19  | 40.4% | II |
| 1KAC | Adenovirus fiber knob protein | Adenovirus receptor                       | SGDKIYDDYY  | -7.23  | 40.4% | II |
| 1E6E | Adrenoxin reductase           | Adrenoxin                                 | TDEENDMLDL  | -10.36 | 40.2% | II |
| 1FQJ | Gt-a                          | RGS9                                      | RVKTTGIIET  | -11.68 | 40.0% | I  |
| 1AHW | Fab 5q9                       | Tissue factor                             | SGKKTAKTNT  | -11.83 | 39.1% | II |
| 1DE4 | b2-microglobulin              | Transferrin receptor ectodom.             | WDHMFVDFW   | -8.15  | 38.3% | I  |
| 2BTF | Actin                         | Profilin                                  | PIYEGYALPH  | -9.89  | 38.2% | I  |
| 2OT3 | Rab21 GTPase                  | Rabex-5 VPS9 domain                       | EPASADDFLP  | -18.73 | 38.0% | I  |
| 1K5D | Ran GTPase                    | Ran GAP                                   | KKYVATLGE   | -10.80 | 37.8% | I  |
| 1GP2 | Gi-a                          | Gi-b,g                                    | SERKKWIHCF  | -12.75 | 37.5% | I  |
| 1NCA | Fab                           | Flu virus neuraminidase N9                | EDNFGSLSDY  | -9.67  | 37.2% | I  |
| 1BKD | Ras GTPase                    | Son of Sevenless                          | GQEEYSAMRD  | -16.10 | 37.1% | II |
| 1Y64 | Actin                         | BNI1 protein                              | SQQFGINLHM  | -5.50  | 37.0% | I  |
| 1IQD | Fab                           | Factor VIII domain C2                     | SYFTNMFATW  | -10.72 | 36.7% | II |
| 112M | Ran GTPase                    | RCC1                                      | SRVTKNVPN   | -13.97 | 36.3% | I  |
| 1F51 | Sporulation response factor B | Sporulation response factor F             | MNKLQLIKGN  | -7.26  | 34.6% | I  |
| 2B42 | Xylanase                      | Xylanase inhibitor                        | FSRLPHFTGC  | -9.15  | 32.9% | I  |
| 1FAK | Coagulation factor VIIa       | Soluble tissue factor                     | CFCLPAFEGR  | -14.66 | 31.8% | I  |
| 1TMQ | a-Amylase                     | RAG1 inhibitor                            | SVGTSCIPGM  | -8.51  | 30.7% | II |
| 1EER | Erythropoietin                | EPO receptor                              | DTSSFVPLEL  | -15.34 | 30.1% | I  |
| 1XQS | HspBP1                        | Hsp70 ATPase domain                       | TQASLEIDSL  | -11.97 | 29.7% | II |
| 1KXP | Actin                         | Vitamin D binding protein                 | SLYASGRITG  | -11.85 | 28.2% | I  |
| 11BR | Ran GTPase                    | Importin b                                | FHRKKNLQYY  | -10.97 | 27.4% | I  |
| 1BGX | Fab                           | Taq polymerase                            | YGYWYFDVWG  | -6.18  | *     | I  |
| 1EWY | Ferredoxin reductase          | Ferredoxin                                | VGKEMLLPDD  | -1.22  | *     | I  |
| 1N2C | Nitrogenase Mo-Fe protein     | Nitrogenase Fe protein                    | GRGVITAINF  | -5.92  | *     | II |
| 1WQ1 | Ras GTPase                    | Ras GAP                                   | EATTLFRATT  | -7.06  | *     | I  |
| 2O8V | PAPS reductase                | Thioredoxin                               | APKYGIRGIP  | -6.38  | *     | II |
| 2QFW | Fv                            | Human chorionic gonadotropin              | CTLQENPFFS  | -8.09  | *     | II |

‡ First and second partner are as defined in Benchmark 3.0 (Hwang et al., Protein 2008).

\* Technical problem with determining total interface interaction energy
